# Supplementary material for: Separation and purification of Zr from a low-temperature LiCl–KCl–CsCl eutectic by the formation of dendritic crystal
Source: publisher site journal article supplement (doi:10.1515/ract-2024-0355), 2025-08-11
Supplement: Supplementary file 1 [file j_ract-2024-0355_suppl_001.docx]

Separation and Purification of Zr from A Low-Temperature LiCl-KCl-CsCl Eutectic by the Formation of Dendritic Crystal

Daoqing Ma, Jichen Xu, ZhiXuan Yi, Bin Ma, Ming Fang*, Xiaoli Tan*

***Corresponding author: Ming Fang and Xiaoli Tan**, a MOE Key Laboratory of Resources and Environmental System Optimization, College of Environmental Science and Engineering, North China Electric Power University, Beijing, 102206, P. R. China,

E-mail: [xltan@ncepu.edu.cn](mailto:xltan@ncepu.edu.cn); [mfang@ncepu.edu.cn](mailto:mfang@ncepu.edu.cn)

**Daoqing Ma, Jichen Xu, ZhiXuan Yi**, **and Bin Ma,** College of Environmental Science and Engineering, North China Electric Power University, Beijing, 102206, P. R. China


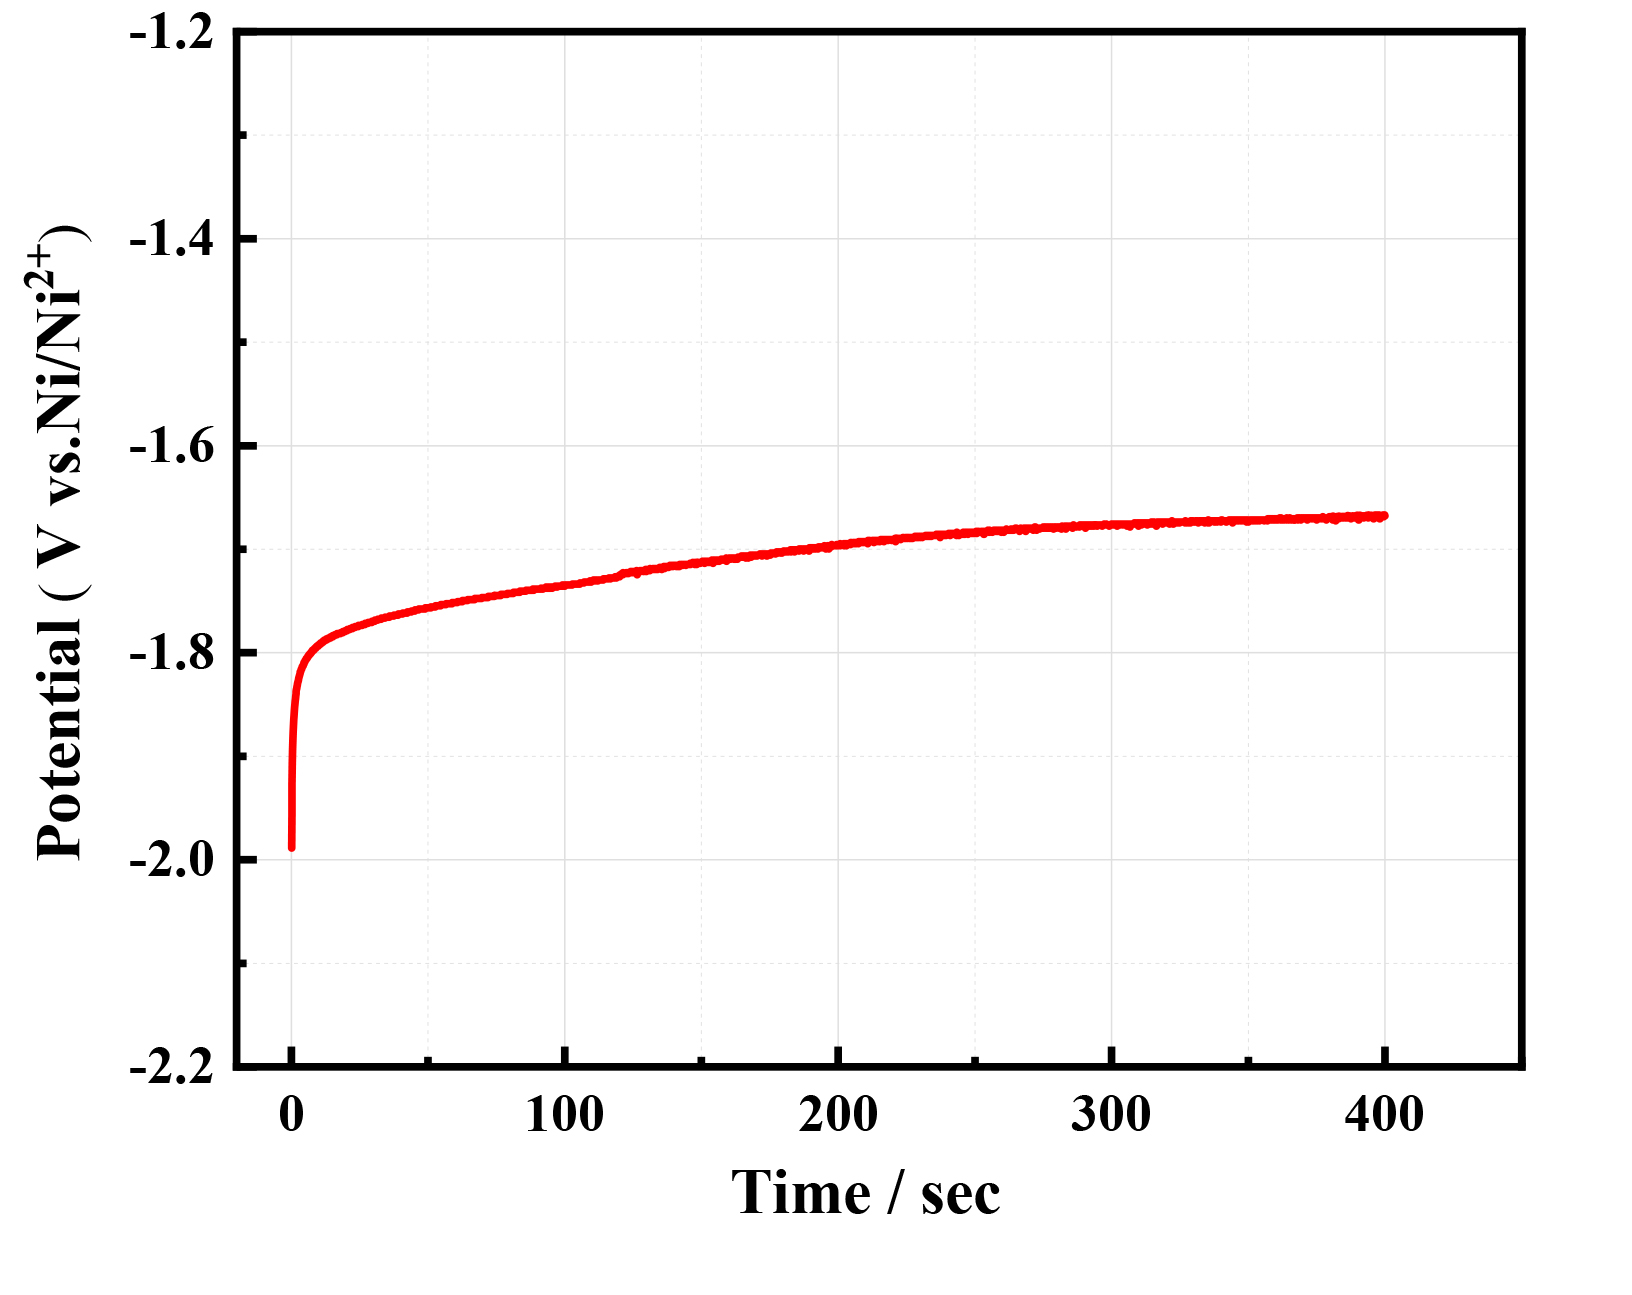


**Figure. S1:** Open circuit voltammogram at 573K on the W electrode after electrodepositing at -2.0 V vs. Ni/Ni2+ for 300s in LiCl-KCl-CsCl-ZrCl4 (2.012×10-4mol cm-3) melts. Working electrode: W (*A*= 0.322 cm2).


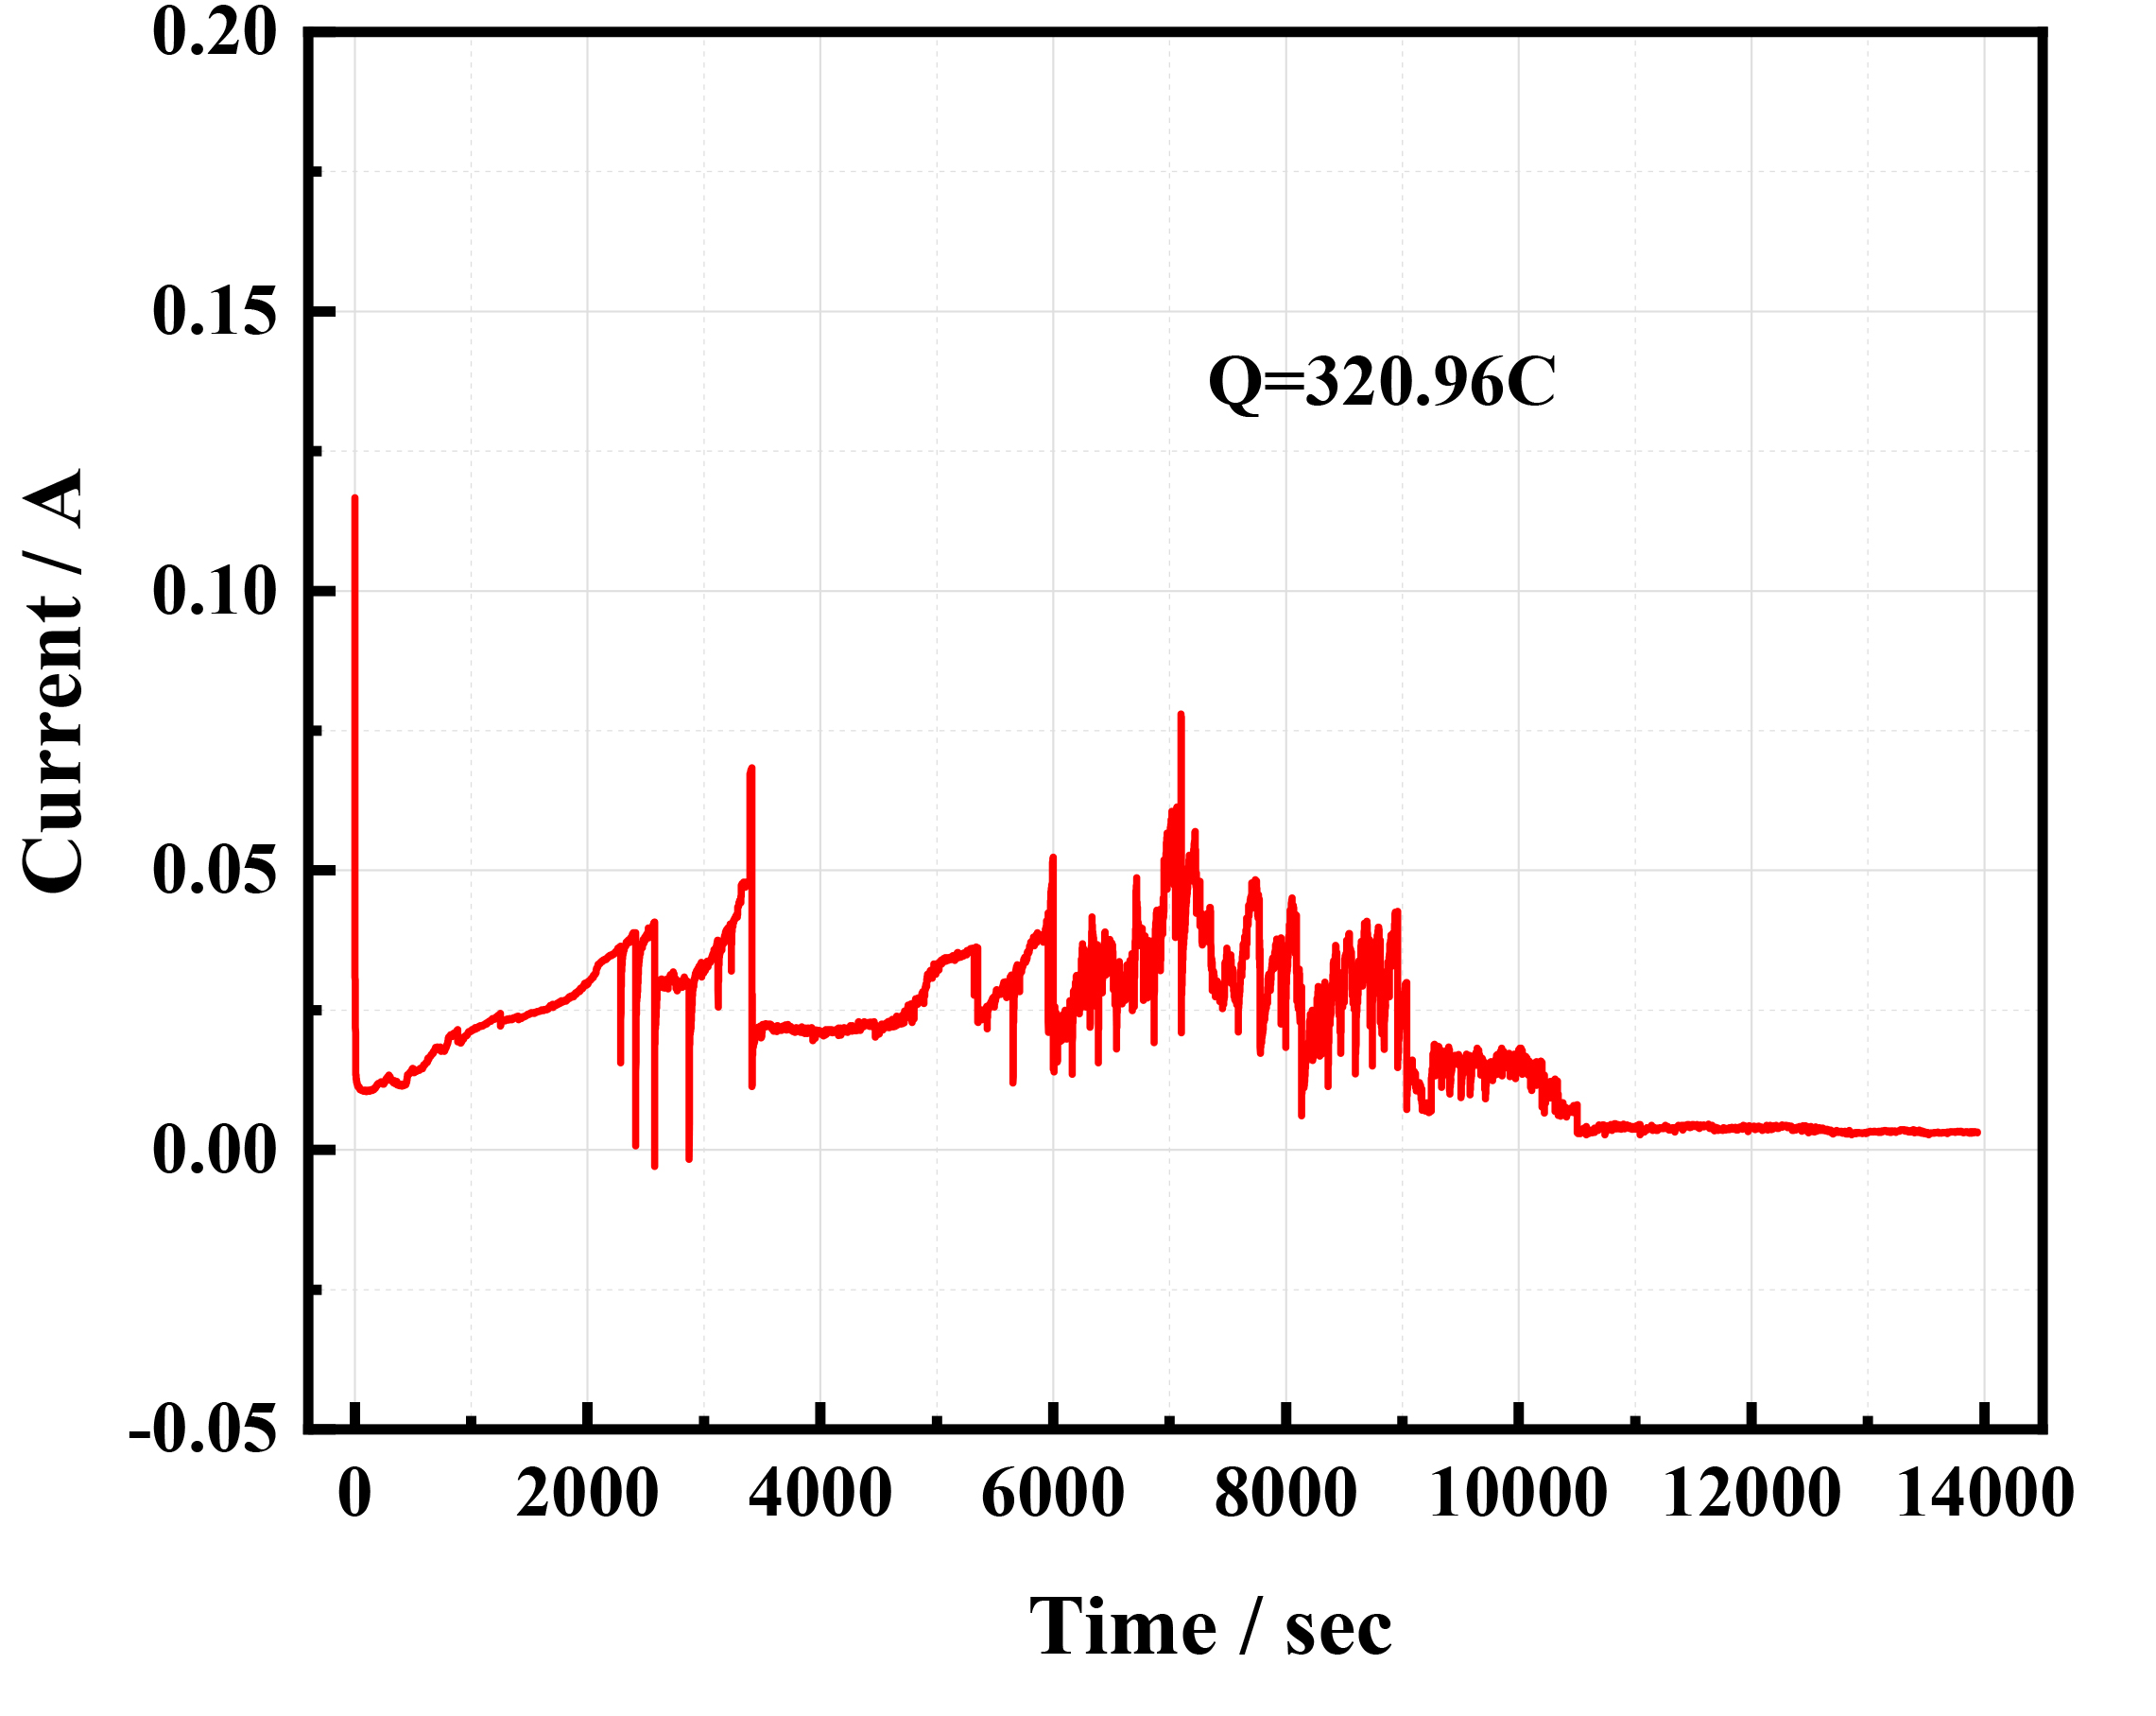


**Figure. S2:** Current vs. time plots obtained by PE at -2.0 V for 4 h in LiCl-KCl-CsCl-ZrCl4 (2.012×10-4mol cm-3) molten salt.
